# Supplementary material
Source: PubMed Central journal article supplement (PMC11721478)
Supplement: 44298_2024_73_MOESM1_ESM.pdf [file 44298_2024_73_MOESM1_ESM.pdf]

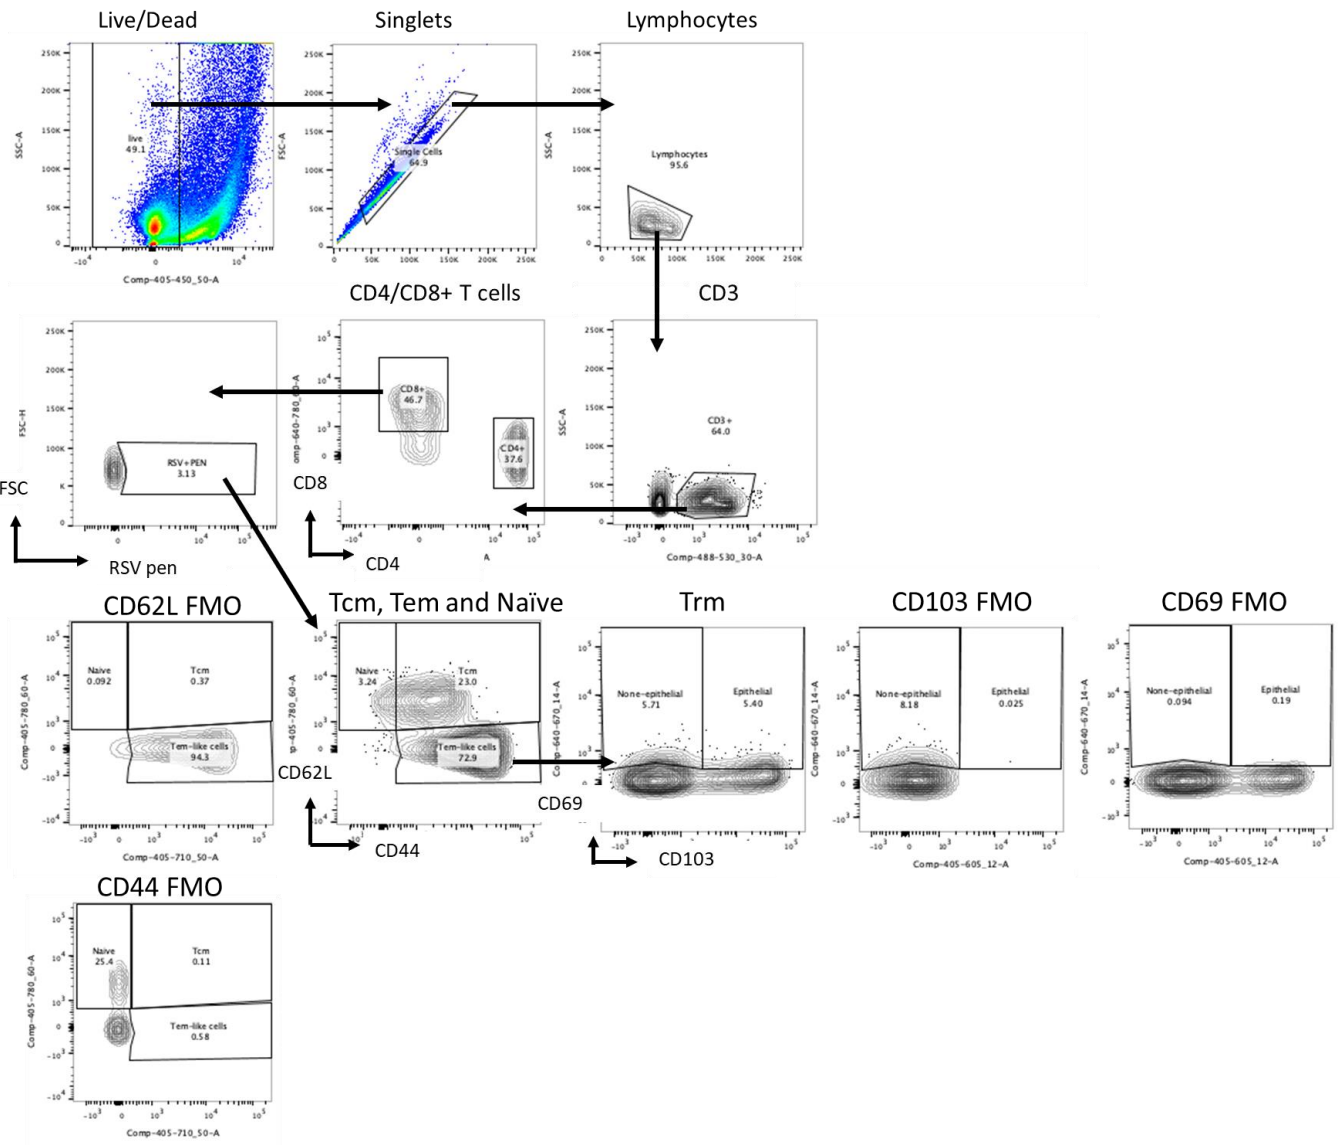

**Fig S1. Gating strategy**

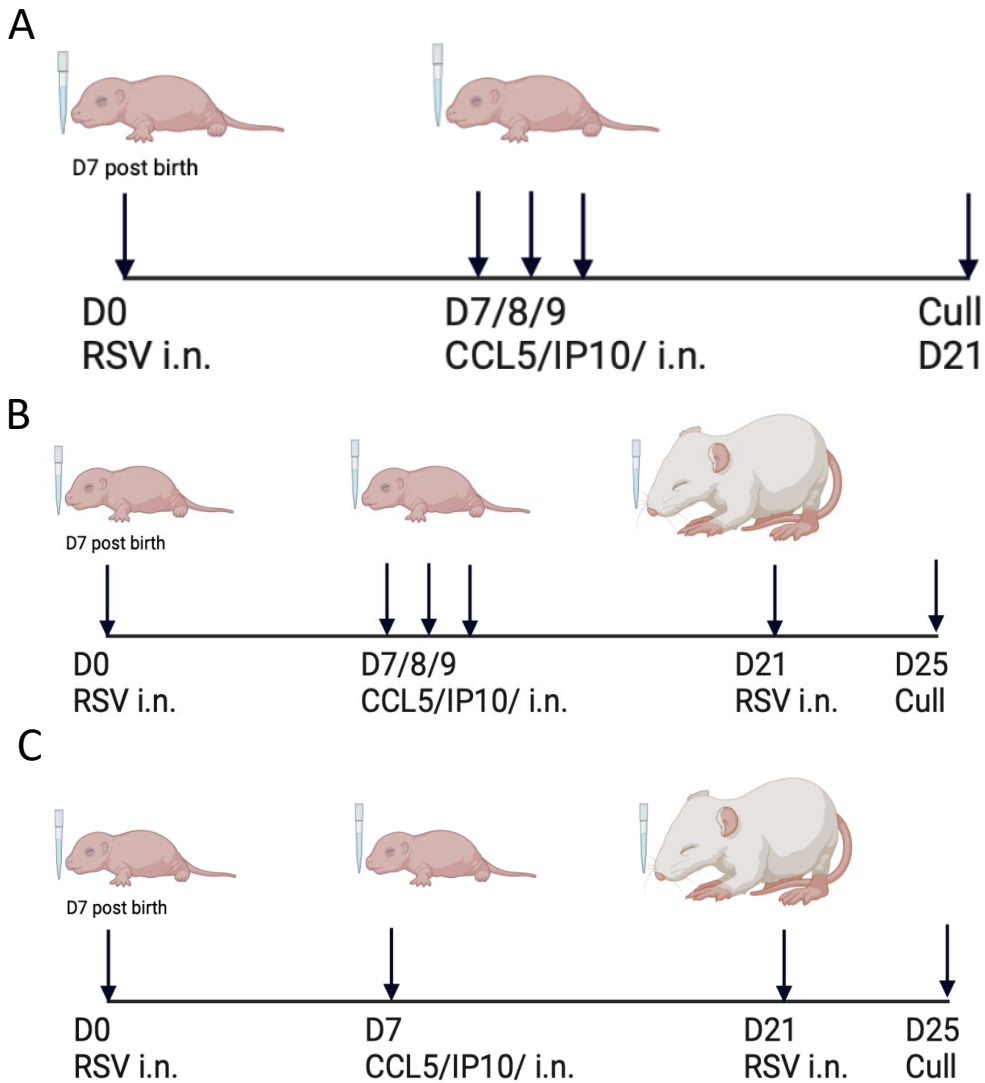

**Fig S2. Chemokine boosting study in early life.** Prime only study – infection with chemokine dosing d7-9 (A); Prime-challenge (B); Prime-Challenge, single chemokine dose (C).
